# Supplementary material for: An exploratory assessment of human and animal health concerns of smallholder farmers in rural communities of Chimborazo, Ecuador
Source: PeerJ. 2022 Jan 17;9:e12208. doi: 10.7717/peerj.12208 (PMC8772447; doi:10.7717/peerj.12208)
Supplement: Supplemental Information 3 [file peerj-10-12208-s003.xlsx]

## Sheet: Surveys_Clean
HeadofHH	AgeRpt	RaceEth	PmryLang	Landowner	TotalHH	HHcatAdult	Adult1Occ	Adult4Occ	Adult2Occ	Adult5Occ	Adult3Occ	HHcatSenior	Senior1Occ	Senior2Occ	HHcatLT5	LTF1Occ	LTF2Occ	HHcat512	Tween1Occ	Tween3Occ	Tween2Occ	HHcat1317	Adol1Occ	Adol3Occ	Adol2Occ	NumPeds	RespEduc	Homeowner	HHAld_Col	HHAld_Main	HHBdrms	HHRunWtr	HHInBath	HHInBNum	HHLatrine	HHWash	HHWashLoc_col	SHLoc	Prop_HH	Prop_NAdj_SH	Prop_Oth	Prop_Total	SHSize_DKR	SHDist_DKR	SHDist	SH_Adj	SH_NAdj_D_M	SH_Add_Dist_M	TimetoSH_DKR
0	40	1	0	0	5	3	Self-employed		Self-employed		Other	0			0			0				2	Student		Student	2	Completed primary school	Owns	Atillo	Center	4	0	0	1	1	0	sink		5			5	FALSE	FALSE	adjacent	TRUE			FALSE
0	38	0	0	1	5	1	Agriculture					0			1	Not yet in school		2	Student		Student	1	Not in school			4	Some primary school	Other	Atillo	Center	2	1	1		1	0		0	0.5			0.5	FALSE	FALSE	adjacent	TRUE			FALSE
0	37	1	0	0	6	3	Agriculture		Agriculture		Other	0			0			1	Student			2	Student		Student	3	Completed primary school	Owns	Atillo	Outlying	4	0	0		1	0	sink	0	10			10	FALSE	FALSE	adjacent	TRUE			FALSE
0	63	0	0	0	3	3	Agriculture		Agriculture		Agriculture	0			0			0				0				0	Completed primary school	Owns	Atillo	Outlying	1	1	1		1	0	creek	0	2			2	FALSE	FALSE	adjacent	TRUE			FALSE
0	32	1	0	0	4	2	Agriculture		Agriculture			0			1	Not yet in school		1	Student			0				2	Completed primary school	Owns	Atillo	Center	2	0	1		0	0	faucet	0	0.5			0.5	FALSE	FALSE	adjacent	TRUE			FALSE
0	68	1	0	0	1	0						1	Agriculture		0			0				0				0	Completed primary school	Owns	Atillo	Outlying	1	1	1		1	0	creek	0	5			5	FALSE	FALSE	adjacent	TRUE			FALSE
0	59	2	0	0	3	2	Agriculture		Agriculture			0			0			0				1	Student			1	Completed primary school	Owns	Atillo	Outlying	3	1	1		1	0	laundry sink	0	3			3	FALSE	FALSE	adjacent	TRUE			FALSE
0	56	0	0	0	2	2	Self-employed		Self-employed			0			0			0				0				0	Completed secondary school	Rents	Atillo	Center	4	0	0	1	1	0	sink	0	0.08			0.08	FALSE	FALSE	adjacent	TRUE			FALSE
1	39	0	2	0	6	2	Agriculture		Agriculture			0			2	Not yet in school	Not yet in school	1	Not in school			1	Student + Working			4	No formal education	Owns	Atillo	Outlying	3	1	1		0	0	faucet	0		4		4	FALSE	FALSE	2 hours	FALSE	6000		FALSE
0	61	0	0	0	2	2	Agriculture		Agriculture			0			0			0				0				0	Completed primary school	Owns	Atillo	Outlying	2	1	1		0	0	faucet	0	2			2	FALSE	FALSE	adjacent	TRUE			FALSE
0	35	0	0	1	2	2	Agriculture		Agriculture			0			0			0				0				0	Completed secondary school	Owns	Atillo	Outlying	2	1	1		1	0	creek	0	0.64	0.96		1.6	FALSE	FALSE	adjacent	TRUE			FALSE
0	46	1	0	0	6	2	Agriculture		Agriculture			0			0			2	Student		Student	2	Student		Student	4	Completed primary school	Owns	Atillo	Outlying	2	1	1	1	0	0	laundry sink	0	3	3	20	26	FALSE	FALSE	1 km (farm) & 2 km	FALSE	1000	2000	FALSE
1	32	0	0	1	4	2	Agriculture		Agriculture			0			0			2	Student		Student	0				2	Completed primary school	Rents	Atillo	Outlying	4	1	1		0	0	laundry sink	1	0.25			0.25	FALSE	FALSE	200 m	FALSE	200		FALSE
1	23	0	0	0	6	4	Agriculture	Other	Agriculture		Other	0			0			0				2	Student		Student	2	Some university	Owns	Atillo	Outlying	3	0	1		0	0	laundry sink	0	2	2		4	FALSE	FALSE	adjacent & 1 km	TRUE		1000	FALSE
1	44	0	0	3	4	1	Self-employed					2	Agriculture	Agriculture	0			0				1	Student + Working			1	Completed university	Other	Atillo	Center	4	0	0	1	1	0	sink	0	2			2	FALSE	FALSE	adjacent	TRUE			FALSE
1	42	1	0	1	3	1	Agriculture					2	Agriculture	Agriculture	0			0				0				0	Completed secondary school	Other	Atillo	Center	3	1	1		1	0	sink	0	20	4		24	FALSE	FALSE	adjacent (house) & 1 km	TRUE		1000	FALSE
0	35	1	0	0	5	2	Agriculture		Agriculture			0			0			1	Student			2	Student		Student	3	Completed primary school	Owns	Atillo	Center	2	0	0		1	0	laundry sink	0	3	10		13	FALSE	FALSE	adjacent & 500 m	TRUE		500	FALSE
0	40	1	0	0	3	2	Agriculture		Agriculture			0			0			1	Student			0				1	Completed primary school	Owns	Atillo	Center	2	0	0	1	0	0	sink	0	10			10	FALSE	FALSE	adjacent	TRUE			FALSE
0	48	0	0	0	7	5	Agriculture	Other	Agriculture	Other	Other	0			0			1	Student			1	Student + Working			2	Completed primary school	Owns	Atillo	Center	4	0	0	1	1	0	laundry sink	0	5			5	FALSE	FALSE	adjacent	TRUE			FALSE
0	38	0	0	0	6	2	Agriculture		Agriculture			0			0			2	Student		Student	2	Student		Student	4	Completed primary school	Owns	Atillo	Center	3	0	0	1	0	0	sink	0	2			2	FALSE	FALSE	adjacent	TRUE			FALSE
0	49	0	0	0	4	4	Agriculture	Professional	Agriculture		Other	0			0			0				0				0	Completed primary school	Owns	Atillo	Outlying	3	0	0	2	1	0	sink	0	2			2	FALSE	FALSE	adjacent	TRUE			FALSE
0	25	0	0	0	4	2	Professional		Agriculture			0			1	Not yet in school		1	Student			0				2	Some secondary school	Owns	Atillo	Outlying	2	0	0	1	1	0	sink	0	1.5			1.5	FALSE	FALSE	adjacent	TRUE			FALSE
1	30	0	0	0	7	2	Agriculture		Agriculture			1	Retired		1	Not yet in school		2	Student		Student	1	Student			4	Some primary school	Owns	Atillo	Center	3	1	1		0	0	faucet	0	2	6		8	FALSE	FALSE	2 km	FALSE	2000		FALSE
0	70	0	0	0	6	3	Agriculture		Other		Other	1	Agriculture		0			0				2	Student		Student	2	Some primary school	Owns	Atillo	Center	5	1	1		1	0	faucet	0	2			2	FALSE	FALSE	adjacent	TRUE			FALSE
0	70	0	0	0	3	2	Homemaker		Other			1	Agriculture		0			0				0				0	Completed primary school	Owns	Atillo	Center	3	0	0	1	1	0	sink	0	0.04			0.04	FALSE	FALSE	adjacent	TRUE			FALSE
0	37	1	2	0	7	2	Agriculture		Agriculture			0			1	Not yet in school		1	Student			3	Student	Student	Student	5	Completed primary school	Owns	San Antonio	Outlying	4	1	1		0	0	faucet	0	1	0.32		1.32	FALSE	FALSE	1 km	FALSE	1000		FALSE
0	37	1	2	0	5	2	Agriculture		Agriculture			0			0			2	Student		Student	1	Student			3	Completed primary school	Owns	San Antonio	Outlying	3	0	1		0	0	laundry sink	1	0.64			0.64	FALSE	FALSE	2 km	FALSE	2000		FALSE
0	45	1	2	0	6	2	Agriculture		Agriculture			0			1	Not yet in school		1	Student			2	Student		Student	4	Some primary school	Owns	San Antonio	Outlying	3	1	1		0	0	laundry sink	1	0.32			0.32	FALSE	FALSE	2 km	FALSE	2000		FALSE
0	40	1	1	0	7	5	Agriculture	Agriculture	Agriculture	Agriculture	Agriculture	0			0			0				2	Student		Student	2	No formal education	Owns	San Antonio	Outlying	4	1	1		0	0	faucet	1	0.64			0.64	FALSE	TRUE		FALSE			FALSE
0	38	1	2	0	4	2	Agriculture		Agriculture			0			0			0				2	Student		Student	2	Completed secondary school	Owns	San Antonio	Center	3	0	0	1	1	0	sink	1	3			3	FALSE	FALSE	1.5 km	FALSE	1500		FALSE
0	49	1	0	0	7	4	Professional	Agriculture	Agriculture		Agriculture	0			2	Not yet in school	Student	1	Student			0				3	Completed primary school	Owns	San Antonio	Outlying	4	0	1		1	0	laundry sink	0	1	3		4	FALSE	FALSE	adjacent & 4 km	TRUE		4000	FALSE
0	25	1	2	0	4	2	Agriculture		Agriculture			0			0			2	Student		Student	0				2	Completed primary school	Owns	San Antonio	Outlying	4	0	0	1	1	0	faucet	0	0.02	2		2.02	FALSE	FALSE	300 m	FALSE	300		FALSE
0	62	1	2	0	2	1	Agriculture					1	Homemaker		0			0				0				0	Some primary school	Owns	San Antonio	Outlying	4	1	1		1	0	laundry sink	0	3	0.32		3.32	FALSE	FALSE	adjacent & 2 km	TRUE		2000	FALSE
0	36	1	0	0	5	2	Agriculture		Agriculture			0			0			2	Student		Student	1	Student			3	Completed primary school	Owns	San Antonio	Center	4	0	0	1	1	0	sink	0	1	5		6	FALSE	FALSE	8 km	FALSE	8000		FALSE
0	45	0	2	0	3	2	Homemaker		Agriculture			1	Agriculture		0			0				0				0	Completed primary school	Owns	San Antonio	Outlying	4	0	1		1	0	sink	0	2	2		4	FALSE	FALSE	500 m	FALSE	500		FALSE
0	72	1	2	0	2	1	Agriculture					1	Agriculture		0			0				0				0	No formal education	Owns	San Antonio	Center	3	1	1		1	0	laundry sink	0	0.64			0.64	FALSE	FALSE	adjacent	TRUE			FALSE
0	51	1	1	0	7	4	Professional	Other	Agriculture		Agriculture	0			0			2	Student		Student	1	Working			3	No formal education	Owns	San Antonio	Center	6	1	1		1	0	laundry sink	0	0.32	1		1.32	FALSE	TRUE	adjacent & don't know	TRUE			FALSE
0	32	1	2	0	5	2	Agriculture		Agriculture			0			0			1	Not in school			2	Student		Student	3	Some secondary school	Owns	San Antonio	Center	5	1	1		0	0	laundry sink	0	0.04	1		1.04	FALSE	FALSE	adjacent & 4 km	TRUE		4000	FALSE
1	18	1	0	1	11	6	Agriculture	Agriculture	Agriculture	Agriculture	Self-employed	0			0			3	Student	Student	Student	2	Student		Student	5	Completed secondary school	Other	San Antonio	Center	3	1	1		1	0	laundry sink	0				0	TRUE	FALSE	adjacent & 4 km	TRUE		4000	FALSE
0	61	0	0	1	6	5	Agriculture	Agriculture	Agriculture	Agriculture	Agriculture	0			0			1	Student			0				1	Some primary school	Other	Atillo	Outlying	2	1	1		0	0	faucet	0	12			12	FALSE	FALSE	adjacent across road	TRUE			FALSE
0	33	1	0	0	4	2	Agriculture		Agriculture			0			0			2	Student		Student	0				2	Some primary school	Owns	Atillo	Outlying	5	1	1		0	0	laundry sink	0	2			2	FALSE	FALSE	adjacent	TRUE			FALSE
1	29	1	1	1	4	3	Professional		Agriculture		Agriculture	0			1	Not yet in school		0				0				1	Some primary school	Other	Atillo	Outlying	3	0	1		0	0	sink	0				0	TRUE	FALSE	adjacent & mas further away	TRUE			FALSE
0	27	1	0	0	3	2	Agriculture		Agriculture			0			0			1	Student			0				1	Completed primary school	Owns	Atillo	Outlying	3	0	0	1	0	0	sink	1	2			2	FALSE	FALSE	500 m	FALSE	500		FALSE
0	29	1	0	1	5	2	Agriculture		Agriculture			0			0			2	Student		Student	1	Student			3	Completed primary school	Other	Atillo	Outlying	3	1	1		0	0	laundry sink	0	1			1	FALSE	FALSE	adjacent	TRUE			FALSE
0	60	1	0	0	3	1	Agriculture					1	Agriculture		0			0				1	Student			1	Completed primary school	Owns	Atillo	Outlying	3	0	0	1	1	0	sink	0	2			2	FALSE	FALSE	adjacent	TRUE			FALSE
0	70	1	2	0	4	1	Agriculture					2	Agriculture	Agriculture	0			1	Student			0				1	Completed primary school	Owns	Puca Totoras	Outlying	5	1	1		1	0	laundry sink	0	2			2	FALSE	FALSE	adjacent	TRUE			FALSE
0	33	1	1	0	3	2	Agriculture		Agriculture			0			0			1	Student			0				1	Completed primary school	Owns	Puca Totoras	Outlying	4	1	1		1	0	sink	0	2			2	FALSE	FALSE	adjacent	TRUE			FALSE
1	20	1	1	1	7	3	Agriculture		Agriculture		Agriculture	0			1	Not yet in school		1	Student			2	Student		Student	4	Completed secondary school	Other	Puca Totoras	Outlying	2	1	1		1	0	laundry sink	0	10			10	FALSE	FALSE	adjacent	TRUE			FALSE
0	45	1	1	0	5	2	Agriculture		Agriculture			0			0			2	Student		Student	1	Student			3	Some primary school	Owns	Puca Totoras	Outlying	3	1	1		1	0	laundry sink	0	4.48			4.48	FALSE	FALSE	adjacent	TRUE			FALSE
0	40	1	2	0	6	4	Agriculture	Agriculture	Agriculture		Agriculture	0			0			1	Student			1	Not in school			2	Completed primary school	Owns	Puca Totoras	Center	2	1	1		1	0	faucet	0	3.5			3.5	FALSE	FALSE	adjacent	TRUE			FALSE
0	30	1	2	0	3	2	Agriculture		Agriculture			0			0			1	Student			0				1	Completed secondary school	Owns	Puca Totoras	Outlying	3	0	1		1	0	laundry sink	0	0.5			0.5	FALSE	FALSE	adjacent	TRUE			FALSE
0	50	1	0	0	3	2	Agriculture		Agriculture			0			0			0				1	Student			1	Completed primary school	Owns	Atillo	Outlying	3	0	0	1	0	0	laundry sink	0	6	6		12	FALSE	FALSE	adjacent & 2 km	TRUE		2000	FALSE
1	23	1	2	0	2	2	Agriculture		Agriculture			0			0			0				0				0	Completed primary school	Owns	Puca Totoras	Outlying	3	1	1		1	0	laundry sink	0	1	1		2	FALSE	FALSE	adjacent & 2 km	TRUE		2000	FALSE
1	26	1	2	0	4	2	Self-employed		Self-employed			0			0			2	Student		Student	0				2	Completed primary school	Owns	Puca Totoras	Center	4	1	1		1	0	laundry sink	0	5	3		8	FALSE	FALSE	adjacent & 1 km	TRUE		1000	FALSE
1	21	1	1	0	4	2	Agriculture		Agriculture			0			1	Not yet in school		1	Student			0				2	Some primary school	Owns	Puca Totoras	Center	3	1	1		1	0	laundry sink	0	2			2	FALSE	FALSE	adjacent	TRUE			FALSE
0	35	0	1	0	5	2	Agriculture		Agriculture			0			1	Not yet in school		2	Student		Student	0				3	Some primary school	Owns	Puca Totoras	Center	2	1	1		1	0	heated water	0	0.5			0.5	FALSE	FALSE	adjacent	TRUE			FALSE
0	57	1	2	0	7	3	Agriculture		Agriculture		Agriculture	0			0			1	Student			3	Student	Not in school	Student	4	Some secondary school	Owns	Puca Totoras	Outlying	2	1	1		1	0	sink	0	10			10	FALSE	FALSE	adjacent	TRUE			FALSE
0	44	1	1	0	8	3	Agriculture		Agriculture		Agriculture	0			1	Not yet in school		3	Student	Student	Student	1	Student			5	Completed primary school	Other	Puca Totoras	Outlying	3	1	1		1	0	laundry sink	1	3			3	FALSE	FALSE	200 m & 400 m	FALSE	200	400	TRUE
[truncated: 123 more columns]
