# Supplementary material for: An exploratory assessment of human and animal health concerns of smallholder farmers in rural communities of Chimborazo, Ecuador
Source: PeerJ. 2022 Jan 17;9:e12208. doi: 10.7717/peerj.12208 (PMC8772447; doi:10.7717/peerj.12208)
Supplement: Supplemental Information 4 [file peerj-10-12208-s004.xlsx]

## Sheet: Sheet1
VarName	Page Name	Variable Label	VarType	Response Options
HeadofHH	Demographics	Head of Household	Number	0 = 'Yes', 1='No', 2=' Don't know', 3='Refused/NA'
AgeRpt	Demographics	Age in years	Number
RaceEth	Demographics	Race/Ethnicity	Number	0 = 'Mestizo', 1 = 'Indigenous/native', 2 = 'Hispanic/Latino', 3 = 'White', 4 = 'Black/Afro-Ecuadoran', 5 = 'Other', 6 = 'Don't know', 7 = 'Refused'
PmryLang	Demographics	Primary language at home	Number	0 = 'Spanish', 1 = 'Quichua', 2 = 'Both equally', 3 = 'Other'
Landowner	Demographics	Landowner	Number	0 = 'Yes', 1='No', 2=' Don't know', 3='Refused/NA'
TotalHH	Household makeup	Total household residents	Number
HHcatAdult	Household makeup	Number of adults in household	Number
Adult1Occ	Household makeup	Occupation - Adult 1	Text	Agriculture, Homemaker, Self-employed, Professional, Disabled, Unemployed, Retired, Other
Adult2Occ	Household makeup	Occupation - Adult 2	Text	Agriculture, Homemaker, Self-employed, Professional, Disabled, Unemployed, Retired, Other
Adult3Occ	Household makeup	Occupation - Adult 3	Text	Agriculture, Homemaker, Self-employed, Professional, Disabled, Unemployed, Retired, Other
Adult4Occ	Household makeup	Occupation - Adult 4	Text	Agriculture, Homemaker, Self-employed, Professional, Disabled, Unemployed, Retired, Other
Adult5Occ	Household makeup	Occupation - Adult 5	Text	Agriculture, Homemaker, Self-employed, Professional, Disabled, Unemployed, Retired, Other
HHcatSenior	Household makeup	Number of seniors in household	Number
Senior1Occ	Household makeup	Occupation - Senior 1	Text	Agriculture, Homemaker, Self-employed, Professional, Disabled, Unemployed, Retired, Other
Senior2Occ	Household makeup	Occupation - Senior 2	Text	Agriculture, Homemaker, Self-employed, Professional, Disabled, Unemployed, Retired, Other
HHcatLT5	Household makeup	Number of children <5 in household	Number
LTF1Occ	Household makeup	Occupation - LT5 1	Text	Student, Not in school yet
LTF2Occ	Household makeup	Occupation - LT5 2	Text	Student, Not in school yet
HHcat512	Household makeup	Number of children ages 5-12 in household	Number
Tween1Occ	Household makeup	Occupation - Tween 1	Text	Student, Not in school, Working, Student + Working
Tween2Occ	Household makeup	Occupation - Tween 2	Text	Student, Not in school, Working, Student + Working
Tween3Occ	Household makeup	Occupation - Tween 3	Text	Student, Not in school, Working, Student + Working
HHcat1317	Household makeup	Number of adolescents in household	Number
Adol1Occ	Household makeup	Occupation - Adolescent 1	Text	Student, Not in school, Working, Student + Working
Adol2Occ	Household makeup	Occupation - Adolescent 2	Text	Student, Not in school, Working, Student + Working
Adol3Occ	Household makeup	Occupation - Adolescent 3	Text	Student, Not in school, Working, Student + Working
NumPeds		Total household children	Number
RespEduc	Household Indicators	Respondent Educational Attainment	Text	No formal education, Some primary school, Completed primary school, Some secondary school, Completed secondary school, Some university, Completed university, Post-graduate study, Trade/vocational program, Other, Refused
Homeowner	Household Indicators	Homeowner	Text	Owns, Rents, Other, Don't know/Refused
HHAld_Col	Household Indicators	Name of Village where home located [Cleaned and collapsed variable]	Text
HHAld_Main		Location of house within village	Text	Center, Outlying
HHBdrms	Household Indicators	Household bedrooms	Number
HHRunWtr	Household Indicators	Household has indoor running water	Number	0 = 'Yes', 1='No', 2=' Don't know', 3='Refused/NA'
HHInBath	Household Indicators	Household has indoor bathroom	Number	0 = 'Yes', 1='No', 2=' Don't know', 3='Refused/NA'
HHInBNum	Household Indicators	Number indoor bathrooms	Number
HHLatrine	Household Indicators	Household has outdoor latrine	Number	0 = 'Yes', 1='No', 2=' Don't know', 3='Refused/NA'
HHWash	Household Indicators	Wash hands after using bathroom when at home	Number	0 = 'Yes', 1='No', 2=' Don't know', 3='Refused/NA'
HHWashLoc_col	Household Indicators	Household handwashing location [Cleaned and collapsed variable]	Text
SHLoc	Farm Details	House is on smallholding property	Number	0 = 'Yes', 1='No', 2=' Don't know', 3='Refused/NA'
SHSize_DKR	Farm Details	Smallholding size unknown	Checkbox	True, False
SHDist	Farm Details	Smallholding distance from home [Cleaned variable]	Text
SHDist_DKR	Farm Details	Smallholding distance unknown	Checkbox	True, False
TimetoSH	Farm Details	Time in minutes to smallholding from home	Number
TimetoSH_DKR	Farm Details	Smallholding time unknown	Checkbox	True, False
SHTrvlType	Farm Details	Travel type	Text	Walking, Horse/donkey, Car/truck, Motorcycle/ATV, Other, Don't know/Refused
Prop_HH		Property size at household (hectares)	Text
Prop_NAdj_SH		Property size of non-adjacent smallholding (hectares)	Text
Prop_Oth		Property size of additional properties (hectares)	Text
Prop_Total		Total property owned/farmed (hectares)	Text
SH_Adj		Smallholding adjacent to household	Checkbox	True, False
SH_NAdj_D_M		Non-adjacent smallholding distance in meters	Number
SH_Add_Dist_M		Additional property distance in meters	Number
HHDog	Animals	Household Dogs	Number
HHCuy	Animals	Household Guinea pigs	Number
HHDonkey	Animals	Household Donkeys	Number
HHCat	Animals	Household Cats	Number
HHRabbit	Animals	Household Rabbits	Number
HHHorse	Animals	Household Horses	Number
HHChkn	Animals	Household Chickens	Number
HHSheep	Animals	Household Sheep	Number
HHLlama	Animals	Household Llamas	Number
HHDuck	Animals	Household Ducks	Number
HHGoat	Animals	Household Goats	Number
HHAlpaca	Animals	Household Alpacas/other camelids	Number
HHPltry	Animals	Household Poultry	Number
HHCattle	Animals	Household Cattle	Number
HHPig	Animals	Household Pigs	Number
HHOthAnimal		Household Other Animals	Number
HHOthAn_specify	Animals	HH Other_specify	Text
SHDog	Animals	Smallholding Dogs	Number
SHCuy	Animals	Smallholding Guinea pigs	Number
SHDonkey	Animals	Smallholding Donkeys	Number
SHCat	Animals	Smallholding Cats	Number
SHRabbit	Animals	Smallholding Rabbits	Number
SHHorse	Animals	Smallholding Horses	Number
SHChkn	Animals	Smallholding Chickens	Number
SHSheep	Animals	Smallholding Sheep	Number
SHLlama	Animals	Smallholding Llamas	Number
SHDuck	Animals	Smallholding Ducks	Number
SHGoat	Animals	Smallholding Goats	Number
SHAlpaca	Animals	Smallholding Alpacas/other camelids	Number
SHPltry	Animals	Smallholding Poultry	Number
SHCattle	Animals	Smallholding Cattle	Number
SHPig		Smallholding Pigs	Number
SHOthAnimal	Animals	Smallholding Other Animals	Number
SHOthAn_specify	Animals	SH Other_specify	Text
SHIrrig	Farm Details 2	Irrigation on smallholding	Number	0 = 'Yes', 1='No', 2=' Don't know', 3='Refused/NA'
SHIrrigHow	Farm Details 2	Irrigation system type	Text	Canal/ditch, Holding pond/cistern/rainwater collection barrels, Municipal water system, Natural spring, Other, Don't know/Refused
SHRunWtr	Farm Details 2	Running water on smallholding	Number	0 = 'Yes', 1='No', 2=' Don't know', 3='Refused/NA'
SHWtrTyp	Farm Details 2	SH running water type	Number	0 = 'Piped', 1='Natural', 2=' Don't know', 3='Refused/NA'
SHInBath	Farm Details 2	Smallholding has indoor bathroom	Number	0 = 'Yes', 1='No', 2=' Don't know', 3='Refused/NA'
SHLatrine	Farm Details 2	Smallholding has outdoor latrine	Number	0 = 'Yes', 1='No', 2=' Don't know', 3='Refused/NA'
SHHWash	Farm Details 2	Wash hands after using bathroom when at smallholding	Number	0 = 'Yes', 1='No', 2=' Don't know', 3='Refused/NA'
SHHWashLoc_col	Farm Details 2	Smallholding handwashing location [Cleaned and collapsed variable]	Text
SHHmWst	Farm Details 2	Smallholding human waste handling	Text	Use river/stream, Bury it, Burn it, Holding pond, Compost pile, Biodigester, Spread directly on crops, Other, Don't know/Refused
HmWst_Col		Smallholding human waste handling [Cleaned and collapsed variable]
SHHmWUse	Farm Details 2	Human waste on crops_specify	Text
SHAnEncl	Animal Enclosures	Animal enclosure on smallholding	Number	0 = 'Yes', 1='No', 2=' Don't know', 3='Refused/NA'
SHEnclDes	Animal Enclosures	Enclosure description	Text
SHAnWst	Animal Enclosures	Smallholding has animal waste management system	Number	0 = 'Yes', 1='No', 2=' Don't know', 3='Refused/NA'
SHWstHow	Animal Enclosures	Type of animal waste management system	Text	Holding pond, Compost pile, Biodigester, Other, Don't know/Refused
AnWst_specify	Animal Enclosures	Animal waste mgmt_specify	Text
AnWstUse	Animal Enclosures	Animal waste use	Text	Spread directly on crops, Compost, Use in adobe, Burn it, No specific use/holding, Other, Don't know/Refused
AnWst_Col		Animal waste use category [Cleaned and collapsed variable]
PerHlth	Health Concerns	Personal health classification	Text	Excellent, Good, Average, Poor, Very poor, Refused
StPerCrn	Health Concerns	Personal concern class	Number	0 = 'Current', 1 = 'Past', 2 = 'Family currently', 3 = 'Family past', 4 = 'Acquaintance currently', 5 = 'Acquaintance past', 6 = 'Community', 7 = 'Heard about', 9 = 'Refused/NA'
P_Access		Personal concerns regarding access	Checkbox	True, False
P_Specific		Personal concerns regarding specific disease	Checkbox	True, False
P_Unspec		Personal concerns regarding unspecified disease	Checkbox	True, False
P_Stress		Personal concerns regarding stress	Checkbox	True, False
P_Gen_None		Personal concerns regarding general wellbeing	Checkbox	True, False
StFamCrn	Health Concerns 2	Family concern class	Number	0 = 'Current', 1 = 'Past', 2 = 'Family currently', 3 = 'Family past', 4 = 'Acquaintance currently', 5 = 'Acquaintance past', 6 = 'Community', 7 = 'Heard about', 9 = 'Refused/NA'
SpPedCrn		Specified pediatric concerns	Checkbox	True, False
F_Access		Family concerns regarding access	Checkbox	True, False
F_Specific		Family concerns regarding specific disease	Checkbox	True, False
F_Unspec		Family concerns regarding unspecified disease	Checkbox	True, False
F_Stress		Family concerns regarding stress	Checkbox	True, False
F_Gen_None		Family concerns regarding general wellbeing	Checkbox	True, False
StAnCrn	Health Concerns 3	Animal concern class	Number	0 = 'Current', 1 = 'Past', 2 = 'Acquaintance currently', 3 = 'Acquaintance past', 4 = 'Community', 5 = 'Heard about', 9 = 'Refused/NA'
A_Access		Animal concerns regarding access	Checkbox	True, False
A_Specific		Animal concerns regarding specific disease	Checkbox	True, False
A_Unspec		Animal concerns regarding unspecified disease	Checkbox	True, False
A_Stress		Animal concerns regarding stress	Checkbox	True, False
A_Gen_None		Animal concerns regarding general wellbeing	Checkbox	True, False
RawMAdlt	Animal Interaction	Respondent consumes raw milk	Number	0 = 'Yes', 1='No', 2=' Don't know', 3='Refused/NA'
RawMPed	Animal Interaction	Any child in household consumes raw milk	Number	0 = 'Yes', 1='No', 2=' Don't know', 3='Refused/NA'
RawWAdlt	Animal Interaction	Respondent drinks untreated water	Number	0 = 'Yes', 1='No', 2=' Don't know', 3='Refused/NA'
RawWPed	Animal Interaction	Any child in household drinks untreated water	Number	0 = 'Yes', 1='No', 2=' Don't know', 3='Refused/NA'
RecWAdlt	Animal Interaction	Respondent uses untreated recreational water	Number	0 = 'Yes', 1='No', 2=' Don't know', 3='Refused/NA'
RecWPed	Animal Interaction	Any child in household uses untreated recreational water	Number	0 = 'Yes', 1='No', 2=' Don't know', 3='Refused/NA'
BtchAdlt	Animal Interaction 2	Respondent helps butcher animals	Number	0 = 'Yes', 1='No', 2=' Don't know', 3='Refused/NA'
BtchPed	Animal Interaction 2	Any child in household helps butcher animals	Number	0 = 'Yes', 1='No', 2=' Don't know', 3='Refused/NA'
MilkAdlt	Animal Interaction 2	Respondent milks cows	Number	0 = 'Yes', 1='No', 2=' Don't know', 3='Refused/NA'
MilkPed	Animal Interaction 2	Any child in household milks cows	Number	0 = 'Yes', 1='No', 2=' Don't know', 3='Refused/NA'
AnWstAdlt	Animal Interaction 2	Respondent interacts with animal waste	Number	0 = 'Yes', 1='No', 2=' Don't know', 3='Refused/NA'
AnWstPed	Animal Interaction 2	Any child in household interacts with animal waste	Number	0 = 'Yes', 1='No', 2=' Don't know', 3='Refused/NA'
AdltDiar	Diarrhea	Respondent had diarrhea in past month	Number	0 = 'Yes', 1='No', 2=' Don't know', 3='Refused/NA'
AdltDDays	Diarrhea	Respondent diarrhea duration	Number
AdltDCare	Diarrhea	Respondent sought medical care	Number	0 = 'Yes', 1='No', 2=' Don't know', 3='Refused/NA'
AdltDDx	Diarrhea	Respondent received diagnosis	Number	0 = 'Yes', 1='No', 2=' Don't know', 3='Refused/NA'
AdltDCause	Diarrhea	Respondent diagnosis	Text
PedDiar	Diarrhea 2	Any child in household had diarrhea in past month	Number	0 = 'Yes', 1='No', 2=' Don't know', 3='Refused/NA'
PedDEpis	Diarrhea 2	Number of household children with diarrhea	Number
Ped1DAge	Diarrhea 2	Age child 1 with diarrhea	Number
Ped1DDay	Diarrhea 2	Child 1 diarrhea duration	Number
Ped1DCare	Diarrhea 2	Child 1 sought medical care	Number	0 = 'Yes', 1='No', 2=' Don't know', 3='Refused/NA'
Ped1DDx	Diarrhea 2	Child 1 received diagnosis	Number	0 = 'Yes', 1='No', 2=' Don't know', 3='Refused/NA'
Ped1DCause	Diarrhea 2	Child 1 diagnosis	Text
AnDiar	Diarrhea 3	Any animal had diarrhea in past month	Number	0 = 'Yes', 1='No', 2=' Don't know', 3='Refused/NA'
AnDDays	Diarrhea 3	Animal diarrhea duration	Number
AnDCare	Diarrhea 3	Animal sought medical care	Number	0 = 'Yes', 1='No', 2=' Don't know', 3='Refused/NA'
AnDDx	Diarrhea 3	Animal received diagnosis	Number	0 = 'Yes', 1='No', 2=' Don't know', 3='Refused/NA'
AnDCause	Diarrhea 3	Animal diagnosis	Text
AnDiar_DKR	Diarrhea 3	Animal diagnosis unknown	Checkbox	True, False
Contrib	Emigrants	Number of adult contributors to household income	Number
Contrib_DKR	Emigrants	Number contributors unknown	Checkbox	True, False
NonHHCont	Emigrants	All income contributors part of household	Number	0 = 'Yes', 1='No', 2=' Don't know', 3='Refused/NA'
HHRemit	Emigrants	Any family member send remittances	Number	0 = 'Yes', 1='No', 2=' Don't know', 3='Refused/NA'
RemitRelat	Emigrants	Remitter relationship	Text
RemitLoc	Emigrants	Remitter location	Text	Inside the country, Another country, Don't know/Refused
RemitAmt	Emigrants	Monthly remittance amount	Number
Remit_DKR	Emigrants	Monthly remittance unknown	Checkbox	True, False
RemitPct	Emigrants	Remittance percentage	Text	A small portion (< 10%), A modest portion (> 10 y < 25%), A substantial portion (> 25% y < 50%), A majority (> 50%), Almost all of it (> 90%), Don't know/Refused
RemitUse_B	Emigrants	Remittance use - build house	Checkbox	True, False
RemitUse_R	Emigrants	Remittance use - remodel house	Checkbox	True, False
RemitUse_P	Emigrants	Remittance use - buy property	Checkbox	True, False
RemitUse_A	Emigrants	Remittance use - buy animals	Checkbox	True, False
RemitUse_C	Emigrants	Remittance use - build corral/enclosure for animals	Checkbox	True, False
RemitUse_H	Emigrants	Remittance use - healthcare	Checkbox	True, False
RemitUse_E	Emigrants	Remittance use - education	Checkbox	True, False
RemitUse_S	Emigrants	Remittance use - start/expand a business	Checkbox	True, False
RemitUse_O	Emigrants	Remittance use - other	Checkbox	True, False
RemUse_specify	Emigrants	Remittance use - other_specify	Text
